# Supplementary material for: Synthesis and In Vitro Screening of Novel Heterocyclic β-d-Gluco- and β-d-Galactoconjugates as Butyrylcholinesterase Inhibitors
Source: MDPI journal article supplement (doi:10.3390/molecules24152833), 2019-08-04

# Synthesis and In Vitro Screening of Novel Heterocyclic $\beta$ -D-Gluco- and $\beta$ -D-Galactoconjugates as Butyrylcholinesterase Inhibitors

Krešimir Baumann <sup>1</sup>, Lorena Kordić <sup>1</sup>, Marko Močibob <sup>1</sup>, Goran Šinko <sup>2,\*</sup> and Srđanka Tomić <sup>1</sup>

<sup>1</sup> Department of Chemistry, Faculty of Science, University of Zagreb, HR-10001 Zagreb, Croatia

<sup>2</sup> Biochemistry and Organic Analytical Chemistry Unit, Institute for Medical Research and Occupational Health, POB 291, HR-10001 Zagreb, Croatia

\* Correspondence: gsinko@imi.hr; Tel.: +385-1-4682-500

## Content

|                                                                                                                    |          |
|--------------------------------------------------------------------------------------------------------------------|----------|
| <b>S1. ESI-MS, <sup>1</sup>H and <sup>13</sup>C NMR spectra of active compounds .....</b>                          | <b>2</b> |
| <i>N1</i> -[2-( $\beta$ -D-glucopyranozyloxy)ethyl]benzimidazole ( <b>5</b> ) .....                                | 2        |
| <i>N1</i> -benzyl- <i>N3</i> -[2-( $\beta$ -D-glucopyranozyloxy)ethyl]benzimidazolium bromide ( <b>7</b> ).....    | 3        |
| <i>N1</i> -[2-( $\beta$ -D-galactopyranozyloxy)ethyl]benzimidazole ( <b>12</b> ).....                              | 5        |
| <i>N1</i> -benzyl- <i>N3</i> -[2-( $\beta$ -D-galactopyranozyloxy)ethyl]benzimidazolium bromide ( <b>14</b> )..... | 6        |

## S1. ESI-MS, <sup>1</sup>H and <sup>13</sup>C NMR spectra of active compounds

*N*1-[2-(β-*D*-glucopyranosyloxy)ethyl]benzimidazole (5)

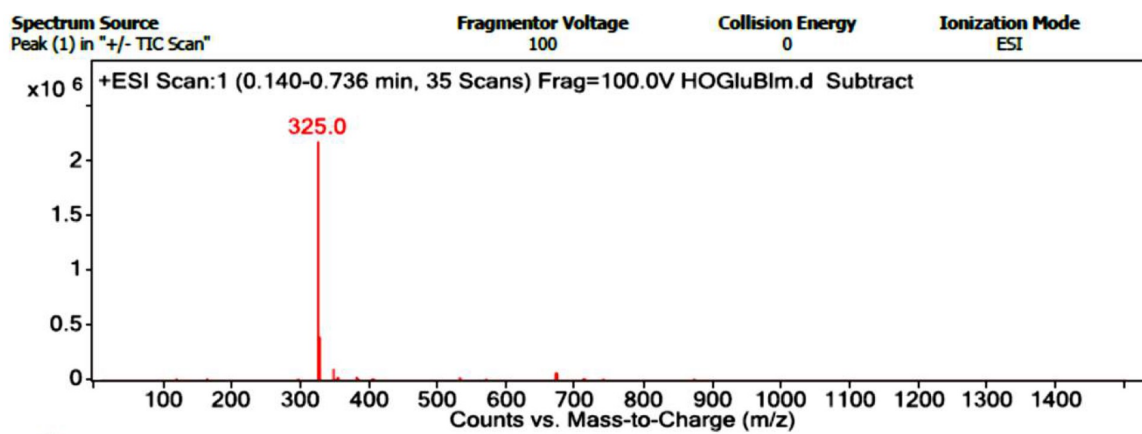

Figure S1. ESI-MS spectra of compound (5)

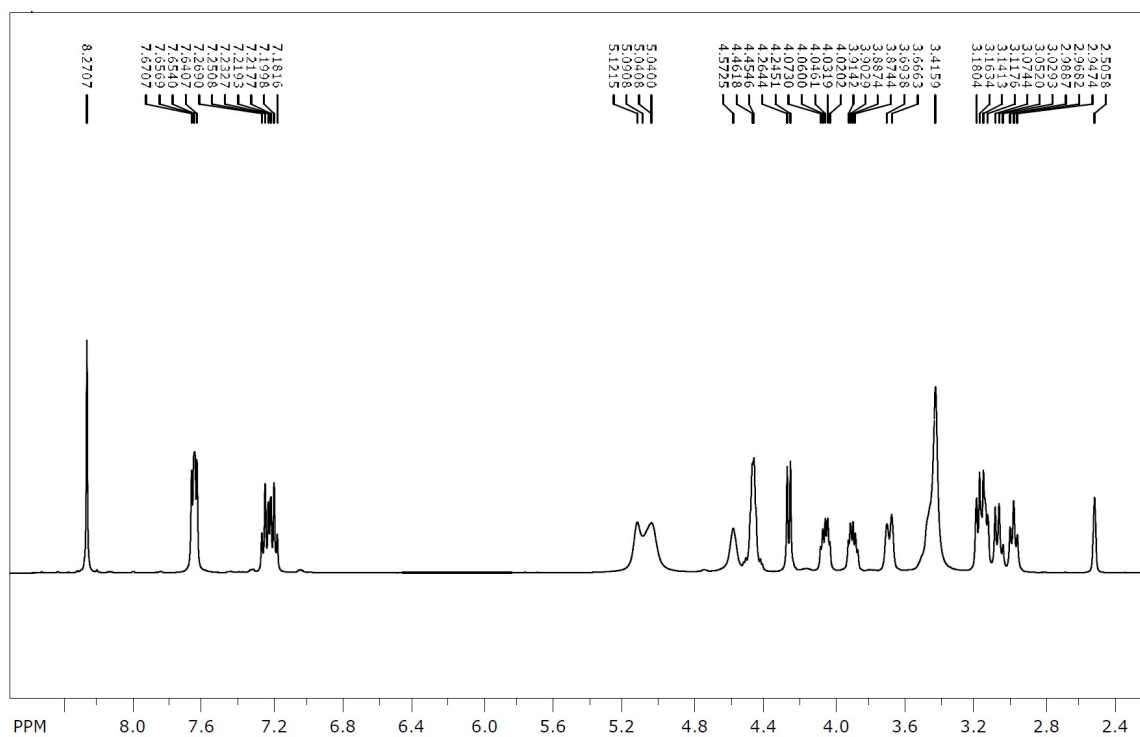

Figure S2. <sup>1</sup>H NMR spectra of compound (5)

Supplemental Material

Baumman et al., Synthesis and in vitro screening of novel heterocyclic  $\beta$ -D-gluco- and  $\beta$ -D-galactoconjugates as butyrylcholinesterase inhibitors

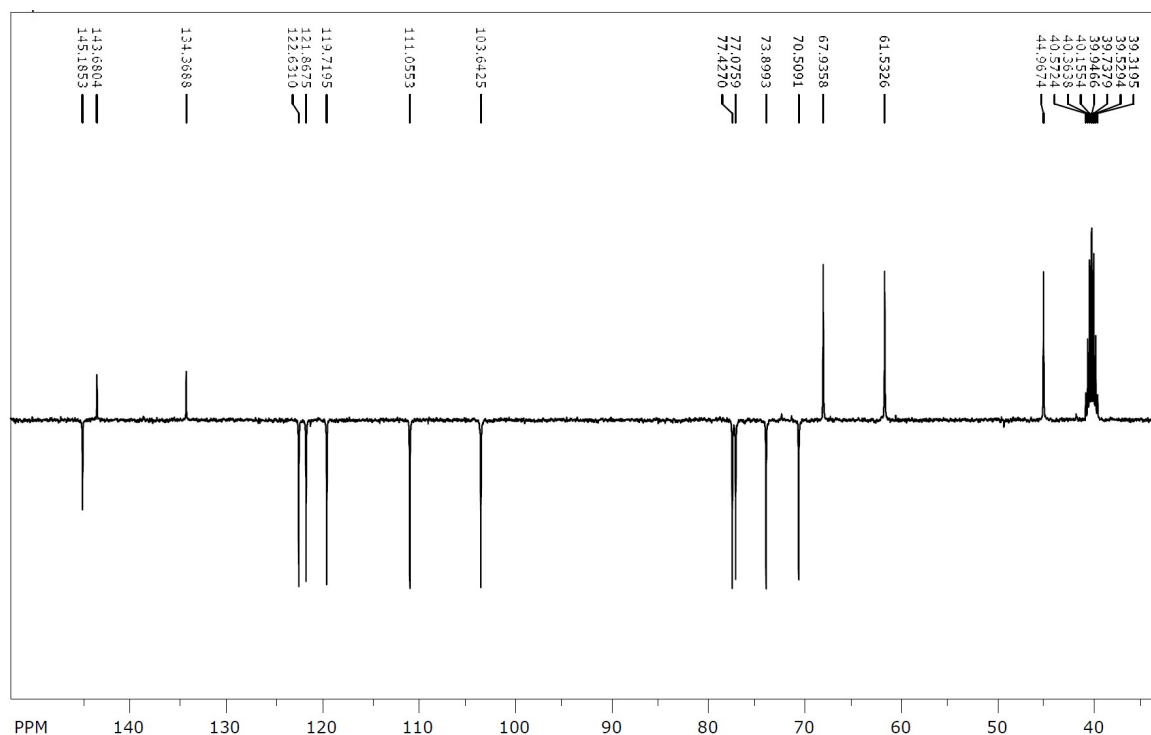

Figure S3.  $^{13}\text{C}$  NMR spectra of compound (5)

*N1-benzyl-N3-[2-( $\beta$ -D-glucopyranosyloxy)ethyl]benzimidazolium bromide (7)*

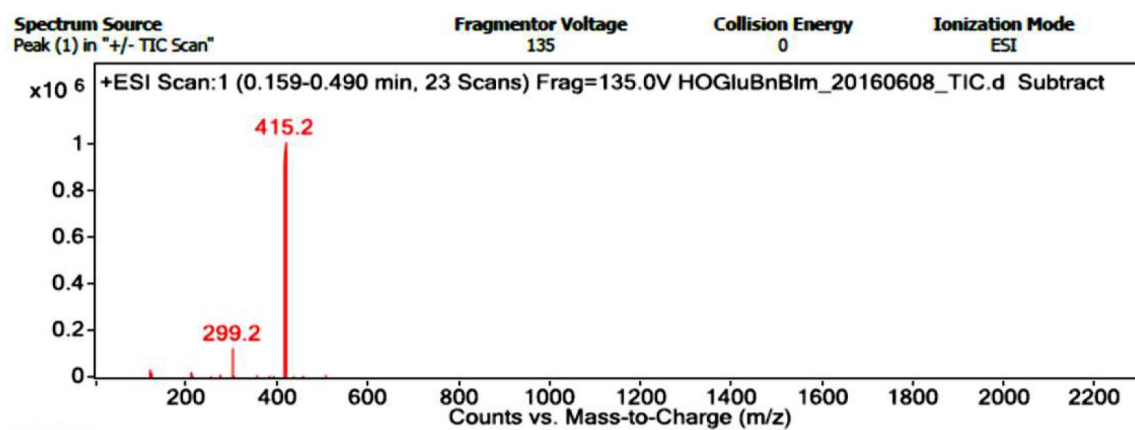

Figure S4. ESI-MS spectra of compound (7)

Supplemental Material

Baumman et al., Synthesis and in vitro screening of novel heterocyclic  $\beta$ -D-gluco- and  $\beta$ -D-galactoconjugates as butyrylcholinesterase inhibitors

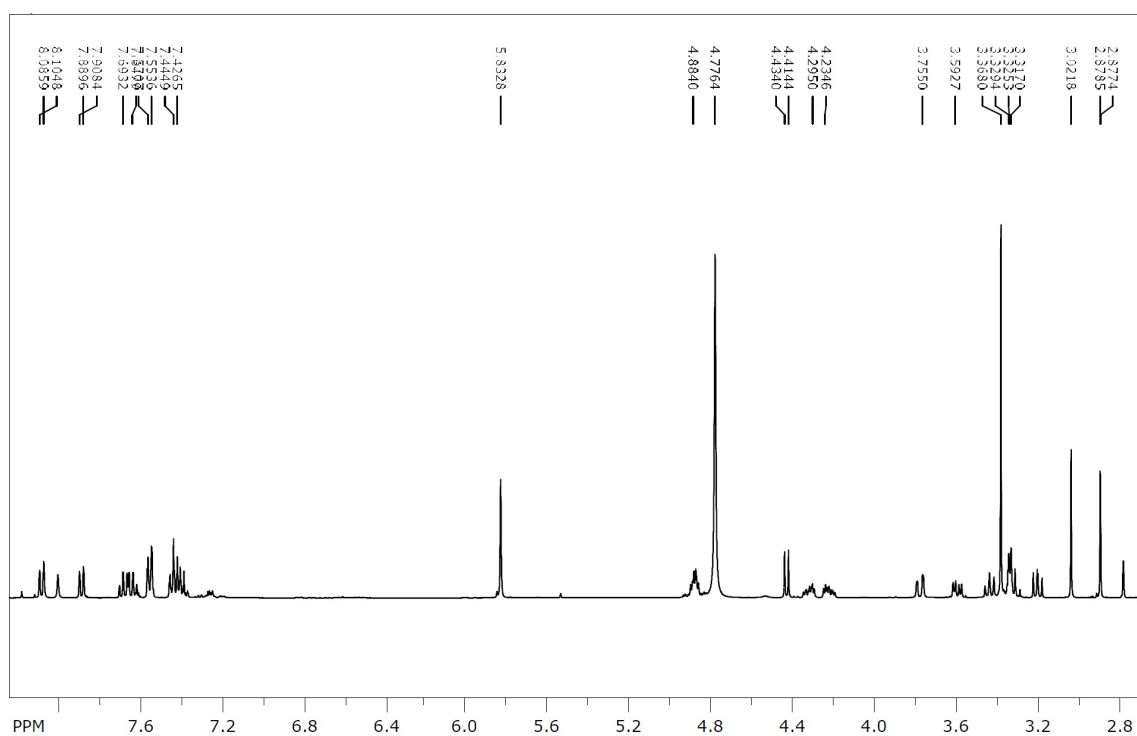

Figure S5. <sup>1</sup>H NMR spectra of compound (7)

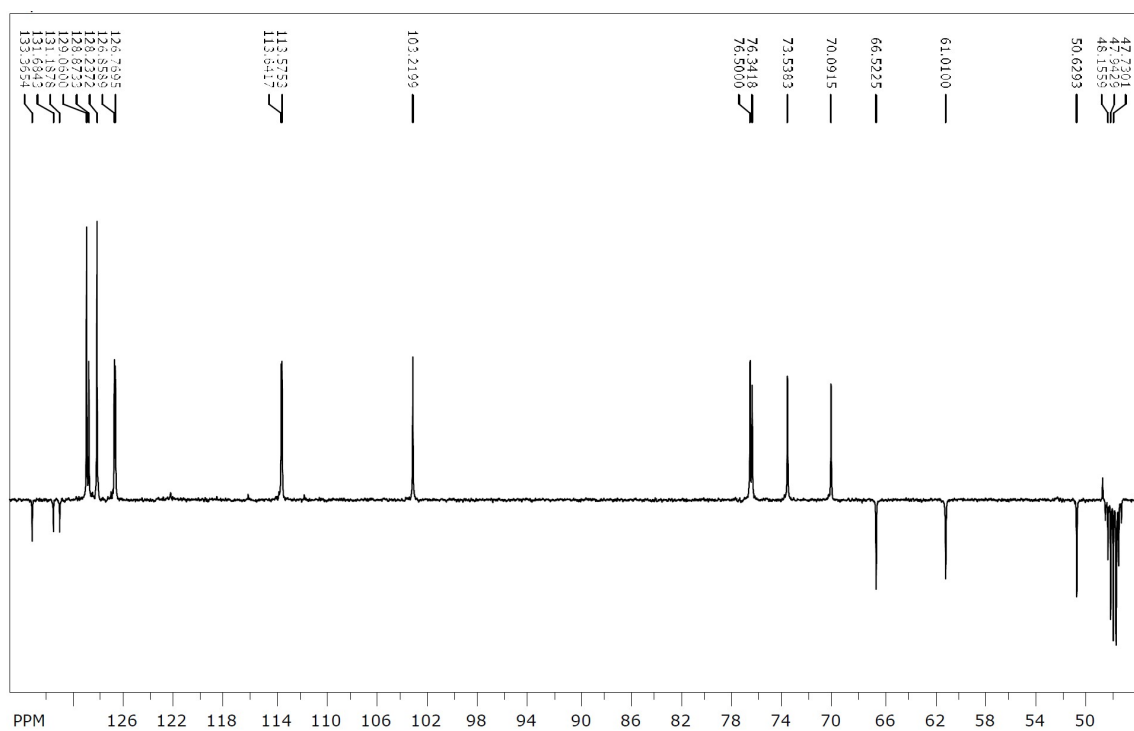

Figure S6. <sup>13</sup>C NMR spectra of compound (7)





Supplemental Material

Baumman et al., Synthesis and in vitro screening of novel heterocyclic  $\beta$ -D-gluco- and  $\beta$ -D-galactoconjugates as butyrylcholinesterase inhibitors

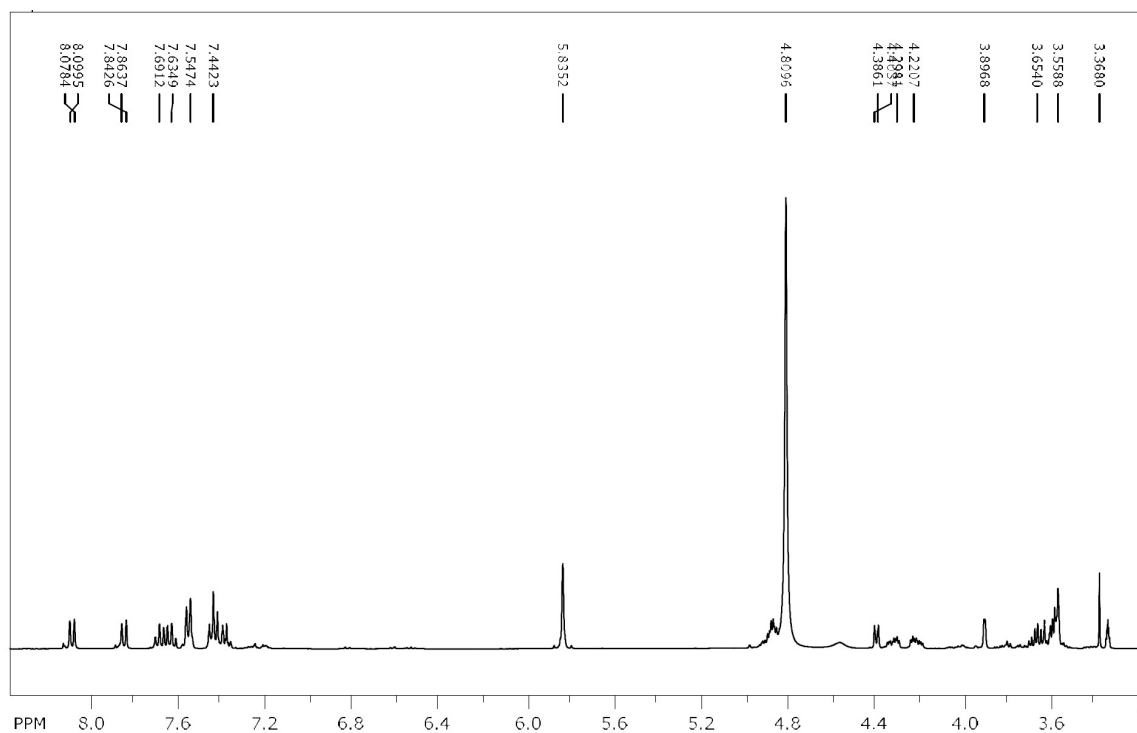

Figure S11. <sup>1</sup>H NMR spectra of compound (14)

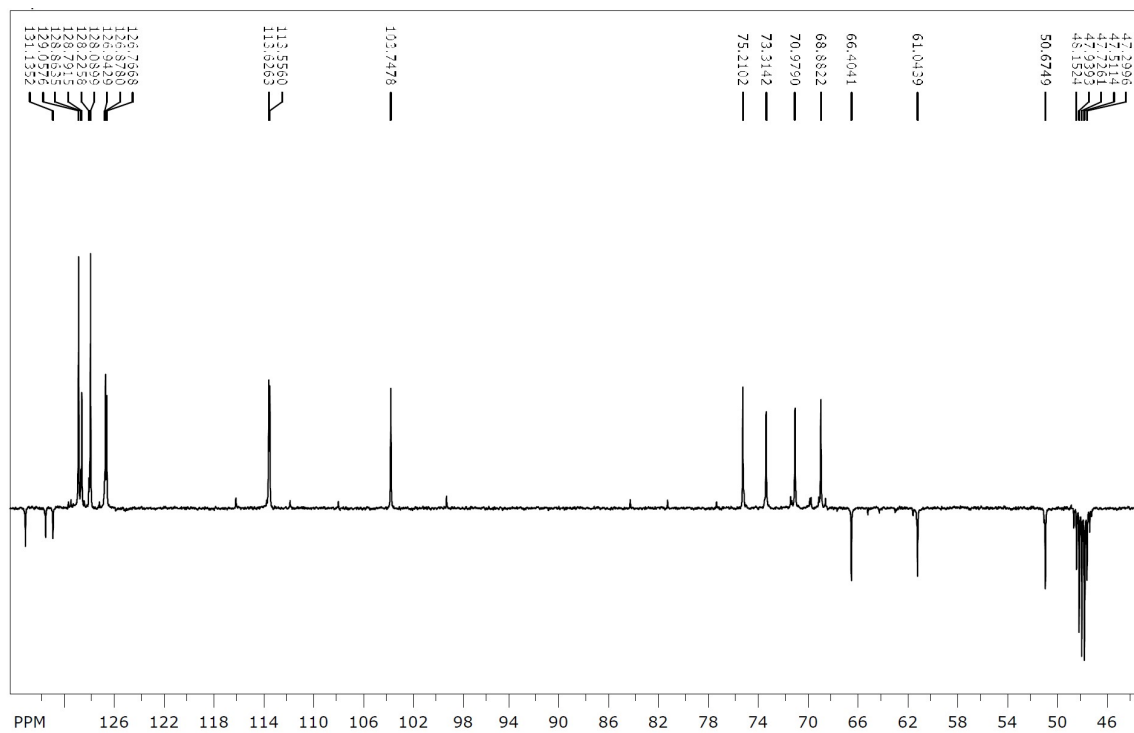

Supplement: s1 [file s1]
